# Supplementary material
Source: Springer Nature journal article supplement (https://www.springermedizin.de/resource/supplementary/12958_2014_1276_MOESM2_ESM.pdf/9566956)

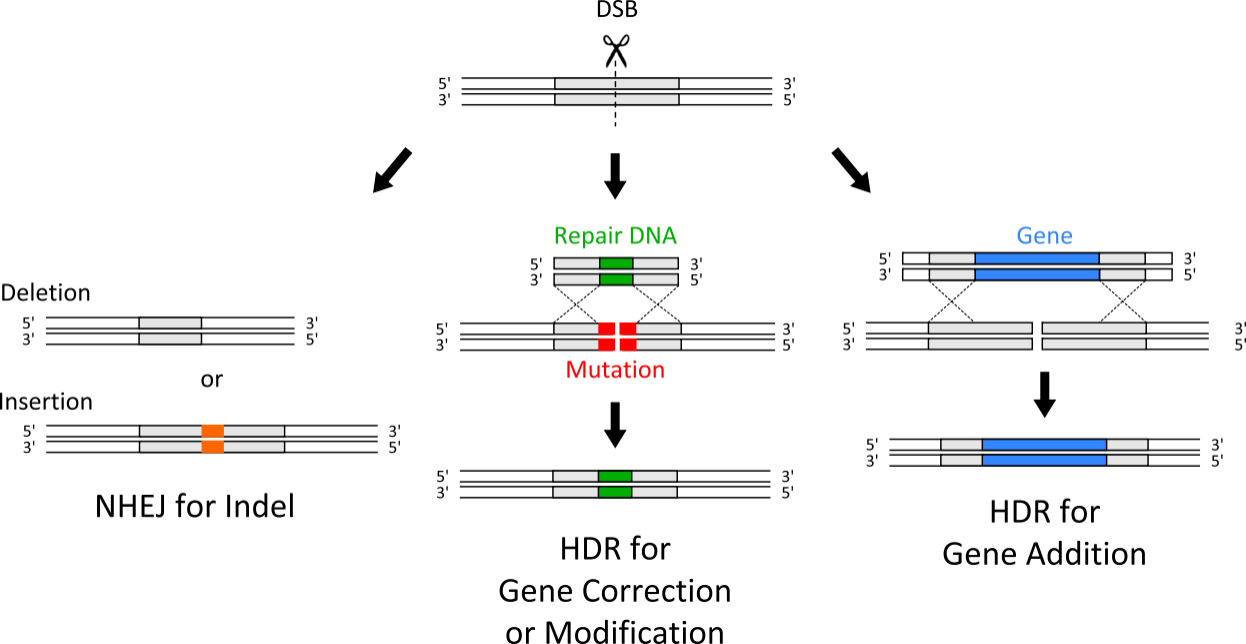

Supplement: MOESM2 [file 9566956]
